# Supplementary material for: Role of a non-canonical surface of Rad6 in ubiquitin conjugating activity
Source: PubMed Central journal article supplement (PMC4605308; doi:10.1093/nar/gkv845), 2015-10-10
Supplement: supp_gkv845_nar-03666-m-2014-File008.pdf [file supp_gkv845_nar-03666-m-2014-File008.pdf]

## SUPPLEMENTARY FIGURES

Figure S1

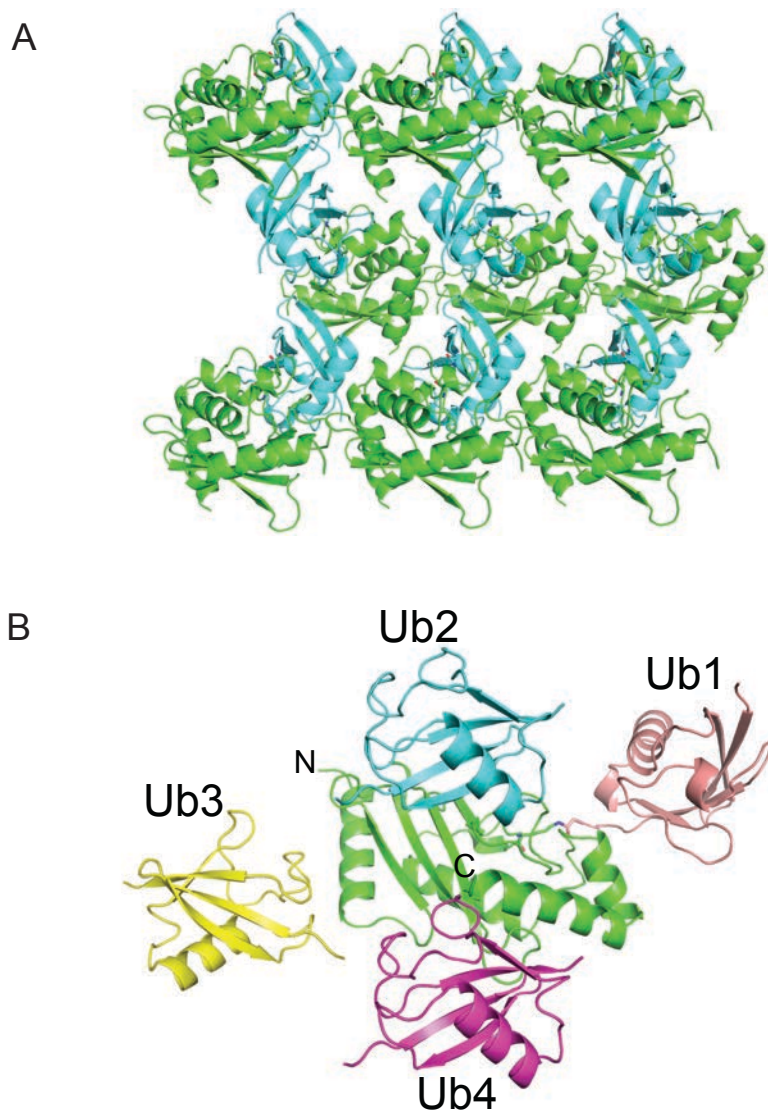

**Figure S1.** (A) Packing of Rad6~Ub conjugates in the crystal. Rad6 is shown in green and ubiquitin in cyan. (B) Packing interactions between Rad6 and four ubiquitin molecules in the Rad6~Ub crystal lattice. The Rad6 (green)~Ub (salmon) conjugate and three symmetry-related ubiquitin molecules that contact Rad6 in the crystal are shown as cartoon representation. Ubiquitin (Ub1) is conjugated to Rad6 via an isopeptide linkage and has a buried interface area with Rad6 of 181.5 Å<sup>2</sup>. Ubiquitin (Ub2) is involved in interactions through the F4 hydrophobic patch and binds to the non-canonical backside of Rad6 with a buried interface of 446.1 Å<sup>2</sup>. Ubiquitin (Ub3) interacts across the N-terminal helix of Rad6 with a buried interface of 240.8 Å<sup>2</sup>. Ubiquitin (Ub4) interacts via its Ile44 surface with Rad6 with a buried interface of 331.9 Å<sup>2</sup>.

**Figure S2**

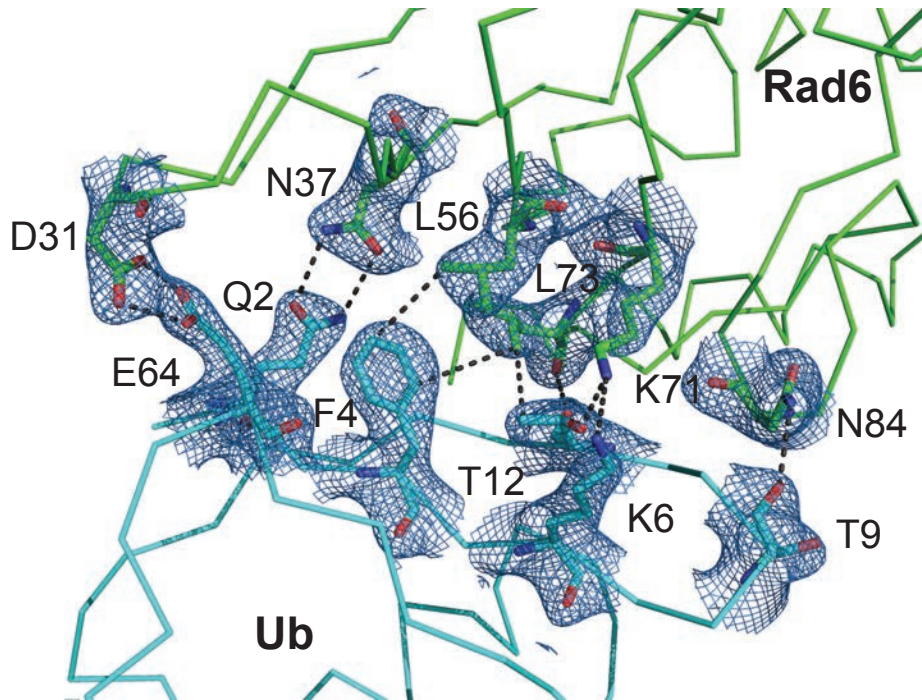

**Figure S2.** Omit map showing non-canonical backside interactions between Rad6 and ubiquitin in the Rad6~Ub crystal structure. The 2Fo-Fc electron density map contoured at 1.0  $\sigma$ .

**Figure S3**

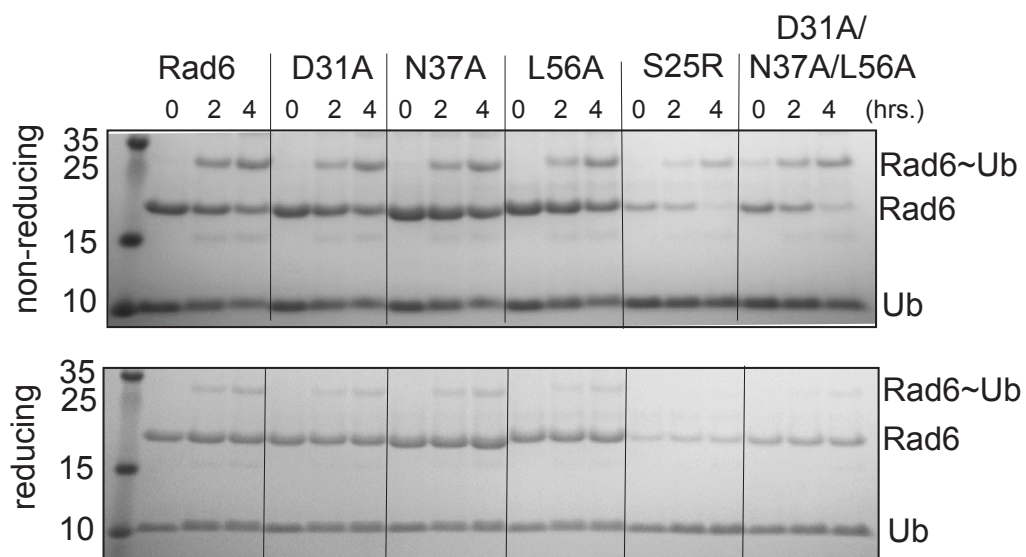

**Figure S3. Charging assays for Rad6 mutants.** Reactions were performed in 1.0  $\mu$ M E1, 20  $\mu$ M Rad6, 50  $\mu$ M Ub in reaction buffer containing 50 mM Tris, pH 7.5, 150 mM NaCl, and 0.5  $\mu$ M TCEP at 30°C. Thioester bond formation was monitored at the indicated time points by SDS-PAGE using sample loading buffer with or without reducing agent as indicated.

**Figure S4**

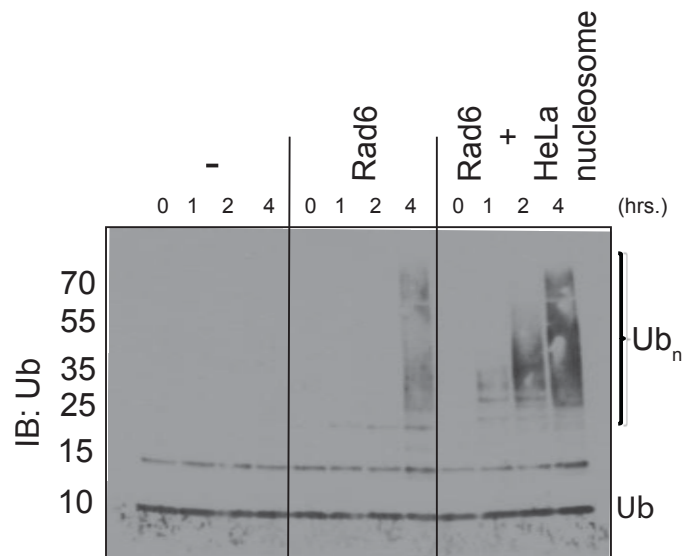

**Figure S4. Rad6 ubiquitin conjugating activity in the presence and absence of HeLa nucleosomes.** The ubiquitination reaction was performed at 30 °C with 2  $\mu$ M Rad6, 0.1  $\mu$ M E1, 20  $\mu$ M ubiquitin, with and without 1.25  $\mu$ M HeLa nucleosomes. Ubiquitin and ubiquitinated H2B were probed by Western blotting using anti-Ub antibody.

Figure S5

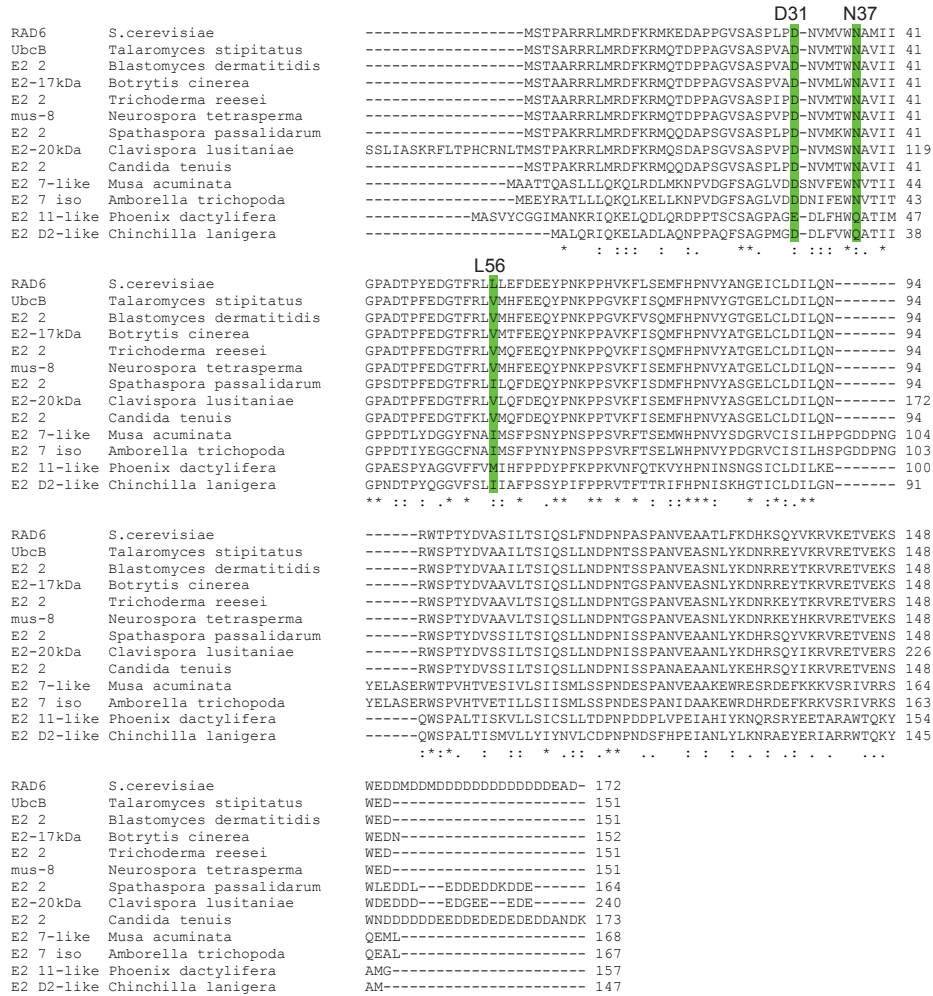

Figure S5. Multiple sequence alignment showing top twelve results of Blast search against the yeast Rad6 sequence.

# Figure S6

```

                                D31  N37
yRad6      --MSTPA--RRRLMRDFKRMKEDAPPVGSASPL--PDNVMVWNAMIIGPADTPYEDGTFRL
hRad6b     --MSTPA--RRRLMRDFKRLQEDPPVGVSGAPS--ENNIMQWNNAVIFGPEGTPFEDGTFKL
hRad6a     -----MVWNNAVIFGPEGTPFEDGTFKL
UBCH5C     --M---A--LKRINKELSDLARDPPAQCSAGPV--GDDMFHWQATIMGPNDSPYQGGVFFL
UBCH5B     --M---A--LKRINKELNDLARDPPAQCSAGPV--GDDMFHWQATIMGPNDSPYQGGVFFL
UBC13      --M---AGLPRRIIKETQRLLAEPVPGIKAEPD--ESNARYFHVVIAGPQDSPFEGGTFKL
Ube2g2     GHMAGTA--LKRLMAEYKQLTLNPPPEGIVAGPMNEENFFEWEALIMGPEDTCFEGVFPA

L56
yRad6      TLEFDEEYPNKPPHVKFLSEMFHPNVYANGEICLDILQ-----NRWTPTYDV
hRad6b     VIEFSEEYPNKPPTVRFLSKMFHPNVYADGSICLDILQ-----NRWSPTYDV
hRad6a     TIEFTEEYPNKPPTVRFVSKMFHPNVYADGSICLDILQ-----NRWSPTYDV
UBCH5C     TIHFPTDYPFKPPKVAFTTRIYHPNINSNGSICLDILR-----SQWSPALTI
UBCH5B     TIHFPTDYPFKPPKVAFTTRIYHPNINSNGSICLDILR-----SQWSPALTI
UBC13      ELFLPEEYPMAAPKVRFMTKIYHPNVDKLGRICLDILK-----DKWSPALQI
Ube2g2     TLSFPLDYPLSPPKMRFTCEMFHPNIYPDGRVCISILHAPGDDPMGYESSAERWSFVQSV

yRad6      ASILTSIQSLFNPNPASPANVEAATLFKDHKSQYVKRVKETVEKSWEDDMDDMDDDDDD
hRad6b     SSILTSIQSLLDEPNPNSPANSQAAQLYQENKREYEKRVSAIVEQSWNDS-----
hRad6a     SSILTSIQSLLDEPNPNSPANSQAAQLYQENKREYEKRVSAIVEQSWRDC-----
UBCH5C     SKVLLSICSLLCDPNPDDPLVPEIARIYKTDRDKYNR-----ISREWTQK-YAM-----
UBCH5B     SKVLLSICSLLCDPNPDDPLVPEIARIYKTDREKYNR-----IAREWTQK-YAM-----
UBC13      RTVLLSIQALLSAPNPDDPLANDVAEQWKTNEAQAIE-----TARAWTRL-YAMNNI---
Ube2g2     EKILLSVVSMLAEPNDESGANVDASKMWRDDREQFYK-----IAKQIVQK--SL-GL---
```

**Figure S6.** Multiple sequence alignment of yeast Rad6 with human RAD6B (UBE2B), RAD6A (UBE2A), UBCH5B (UBE2E2), UBCH5C (UBE2D3) UBC13 (UBE2N) and UBE2G2.

**Figure S7**

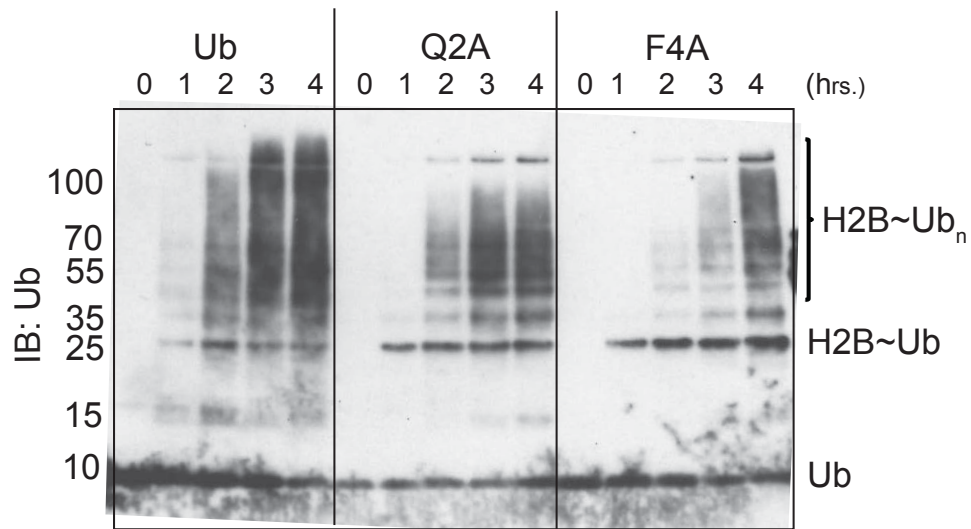

**Figure S7. Histone polyubiquitination assays with wild type ubiquitin and mutants  $Ub^{Q2A}$  and  $Ub^{F4A}$ .** The ubiquitination reaction was performed at 30 °C at the indicated time points with in reaction buffer containing 2  $\mu$ M Rad6, 0.1  $\mu$ M E1, 5 mM ATP, 5 mM  $MgCl_2$ , 1 mM DTT, 20  $\mu$ M ubiquitin, 1.25  $\mu$ M HeLa nucleosomes and 50 mM Tris, pH 7.5. Ubiquitinated H2B and ubiquitin were probed by Western blotting using anti-Ub antibodies.

**Figure S8**

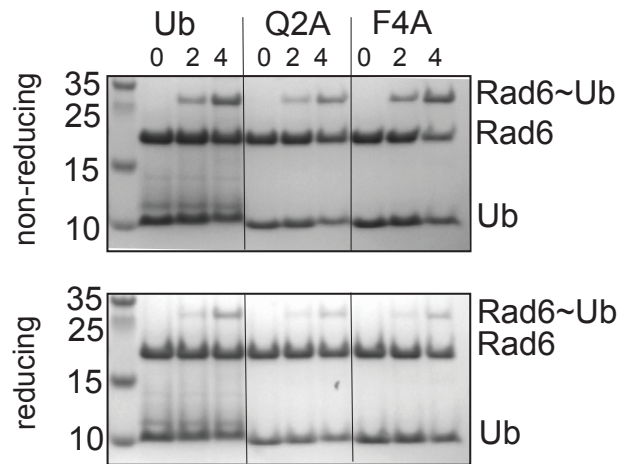

**Figure S8. Charging assays for Rad6 with wild-type (Ub) and mutant ubiquitin.** Thioester bond formation between Rad6 and either wild type or mutant (Ub<sup>Q2A</sup> and Ub<sup>F4A</sup>) ubiquitin was monitored as described in the legend to Figure S3.



Figure S9

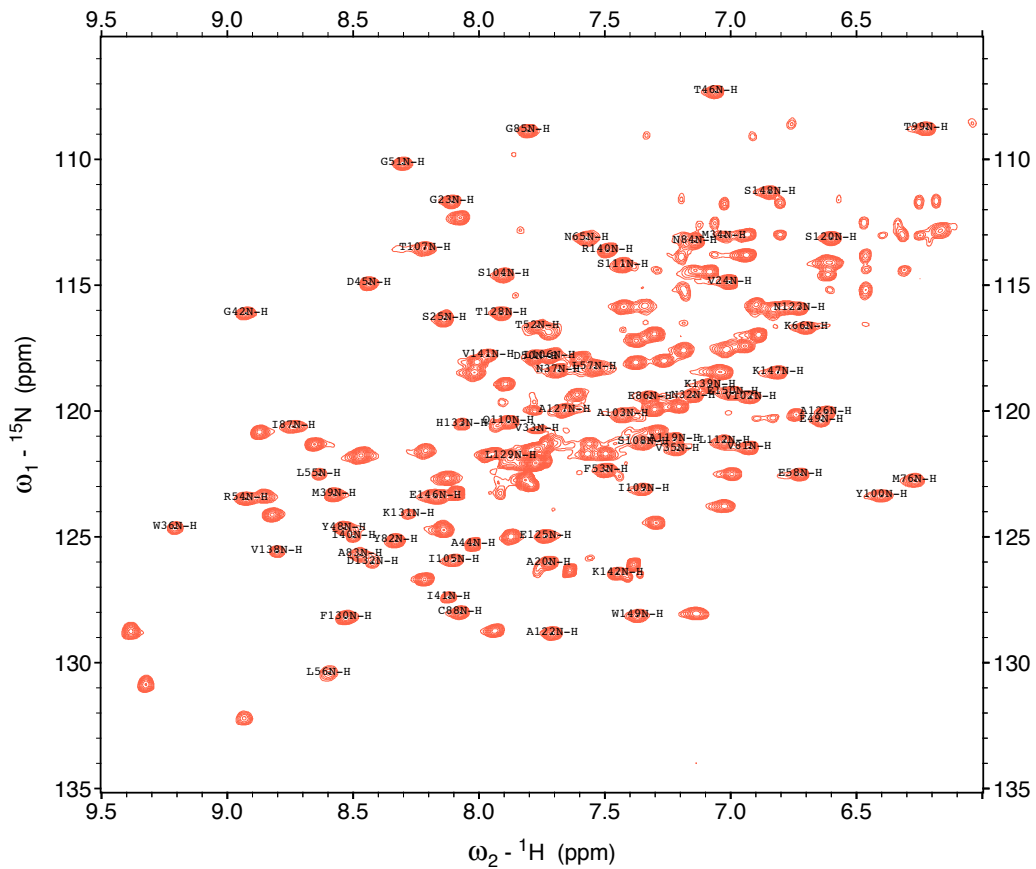

Figure S9. TROSY-HSQC spectra of 70%  ${}^2\text{H}$ ,  ${}^{15}\text{N}$  Rad6 showing assigned residues.

**Figure S10**

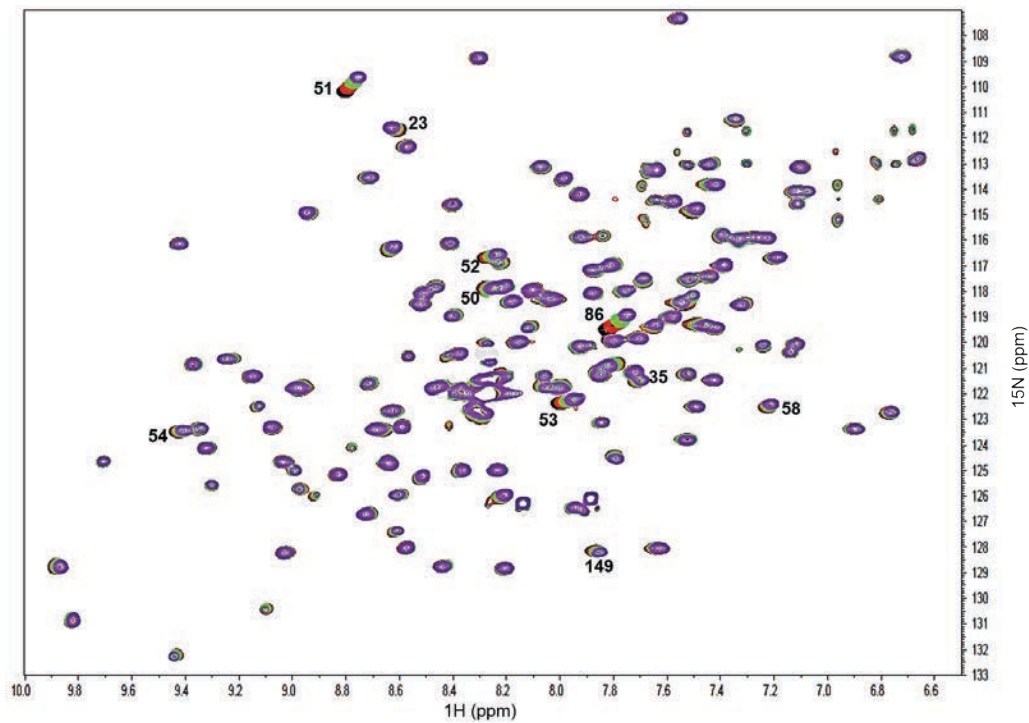

**Figure S10. Interaction of Rad6 and ubiquitin as observed by TROSY-HSQC NMR.** The starting concentration of 70%- $^2\text{H}$ ,  $^{15}\text{N}$ -Rad6 was 150  $\mu\text{M}$ , with ubiquitin added to a final concentration of 200  $\mu\text{M}$  (black), 400  $\mu\text{M}$  (red), 600  $\mu\text{M}$  (green) and 800  $\mu\text{M}$  (purple) for the respective titration points.

**Figure S11**

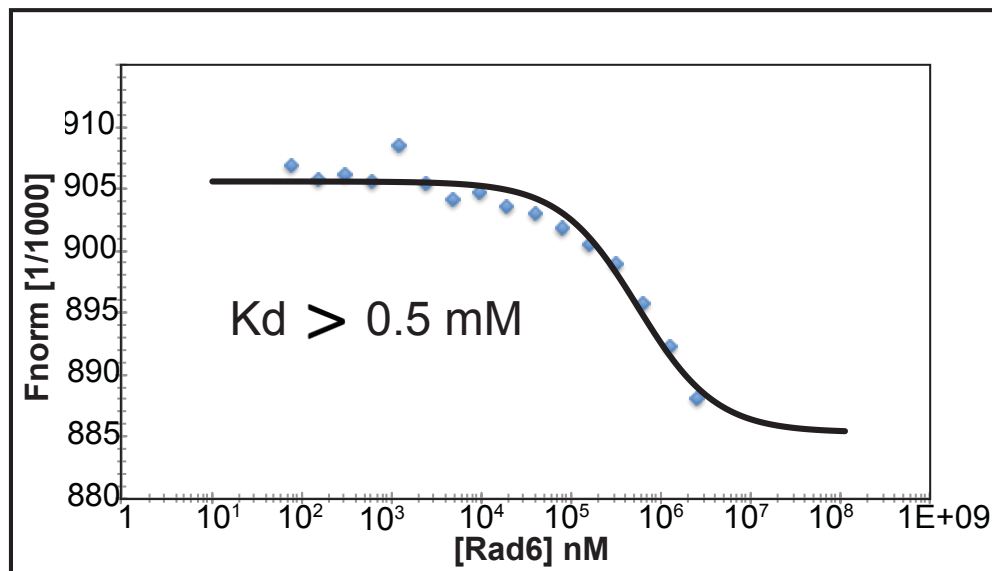

**Figure S11. Interaction of Rad6 and ubiquitin monitored by microscale thermophoresis (MST).** A titration series of Rad6 with protein concentrations from 2540000 – 77.0 nM was performed while the fluorescein-5 maleimide labeled ubiquitin concentration was held constant at ~150 nM. After a short incubation, the samples were loaded into standard glass capillaries and the MST analysis was performed using a Monolith NT.115 (NanoTemper). Concentrations of Rad6 on the x-axis (blue dots) are plotted in nM. The estimated dissociation constant ( $K_d$ ) of 561000 +/-26800 nm determined for this interaction assuming a 1:1 binding model constitutes a lower bound, as binding could not be saturated even at the highest Rad6 concentration.

**Figure S12**

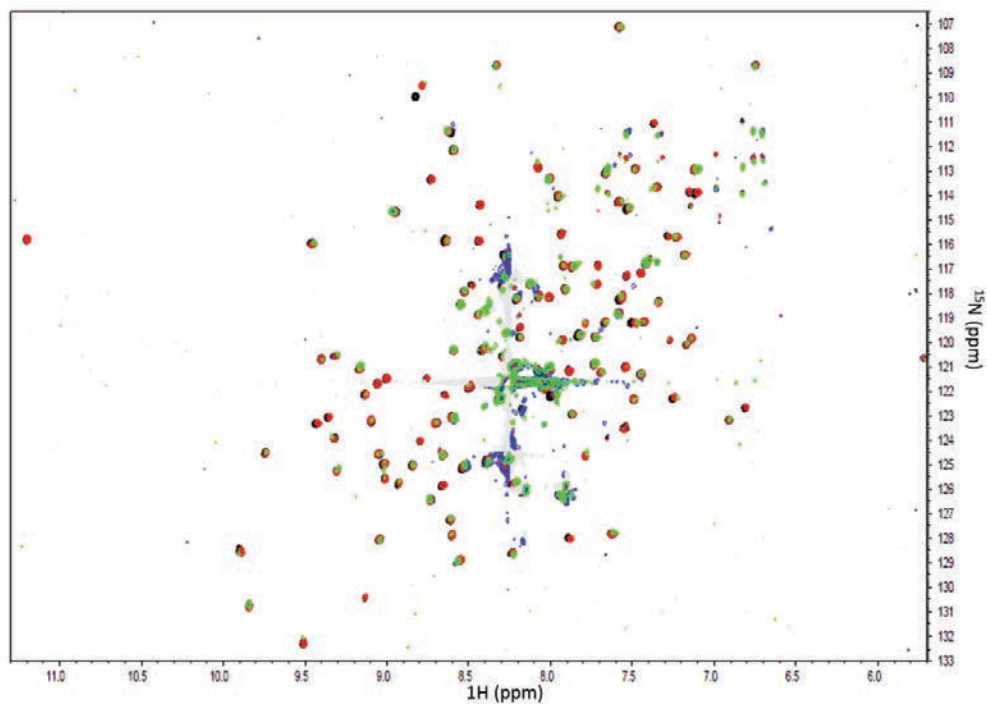

**Figure S12. Oligomerization of Rad6~Ub conjugates monitored by NMR and discharging of conjugates upon addition of DTT and EDTA.** Shown here are the overlaid [<sup>15</sup>N, <sup>1</sup>H]-TROSY HSQC spectra of 250 μM <sup>15</sup>N-Rad6 (black), 250 μM <sup>15</sup>N-Rad6 + 750 μM Ubiquitin (red), 250 μM <sup>15</sup>N-Rad6 + 750 μM Ubiquitin + 10 mM E1 (blue), 250 μM <sup>15</sup>N-Rad6 + 750 μM Ubiquitin + 10 mM E1 + DTT + EDTA (green).

**Figure S13**

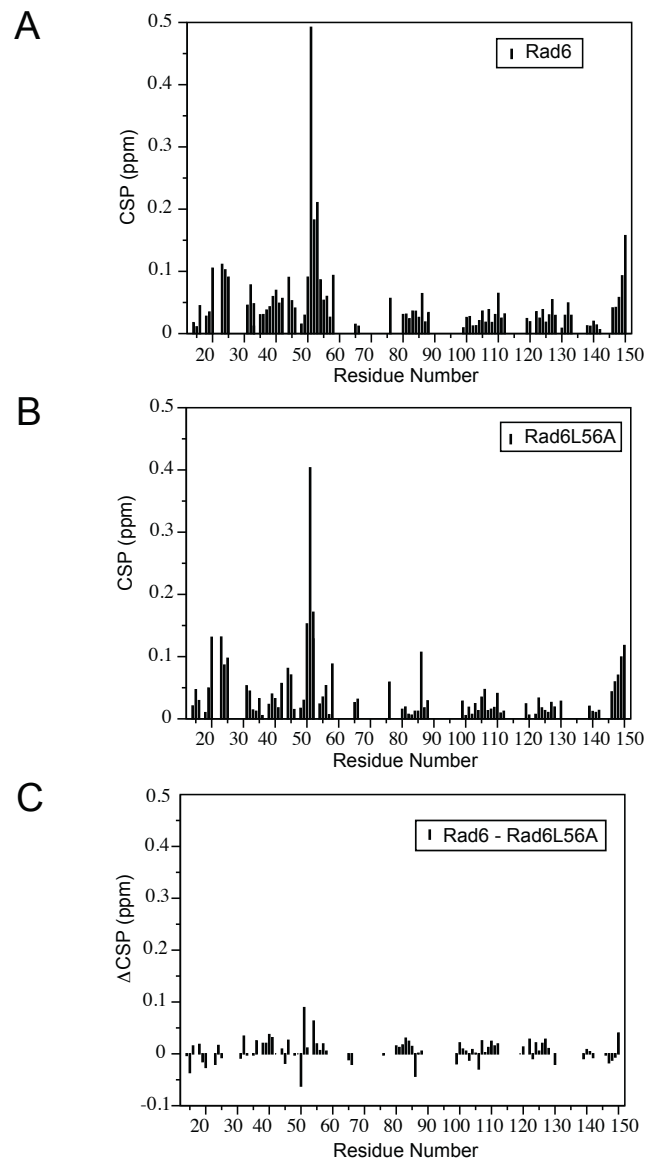

**Figure S13. Monitoring of Rad6-ubiquitin interactions by chemical shift perturbation (CSP)** (A) CSP data from interaction of 750 $\mu$ M ubiquitin titrated into 250 $\mu$ M  $^{15}$ N-Rad6. (B) CSP data from interaction of 750 $\mu$ M ubiquitin into 250 $\mu$ M  $^{15}$ N-Rad6<sup>L56A</sup>. (C) CSP difference data of  $^{15}$ N-Rad6 and  $^{15}$ N-Rad6<sup>L56A</sup> from interaction with ubiquitin.

## Figure S14

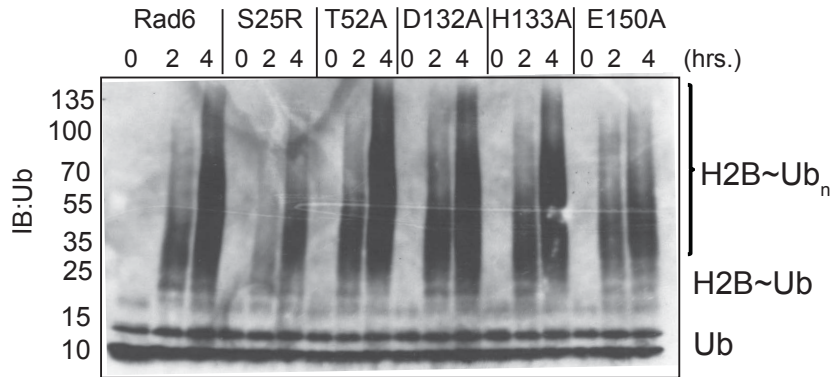

**Figure S14. Histone polyubiquitination assays with Rad6 containing point substitutions at residues that show chemical shift perturbation with free ubiquitin.** Activity of wild type and Rad6 mutants containing S25R, T52A, D132, H133A and E150A substitutions. The ubiquitination reaction was performed at 30 °C at the indicated time points with 2  $\mu$ M Rad6 in reaction buffer containing 0.1  $\mu$ M E1, 5 mM ATP, 5 mM MgCl<sub>2</sub>, 1 mM DTT, 20  $\mu$ M ubiquitin, 1.25  $\mu$ M HeLa nucleosome and 50 mM Tris, pH 7.5. Ubiquitinated H2B and ubiquitin were probed by Western blotting using anti-ubiquitin antibodies.
